# Supplementary material for: Synchronized cell attachment triggered by photo-activatable adhesive ligands allows QCM-based detection of early integrin binding
Source: PubMed Central journal article supplement (PMC4379501; doi:10.1038/srep09533), 2015-03-31
Supplement: srep09533-s2.pdf [file srep09533-s2.pdf]

# Synchronized cell attachment triggered by photoactivatable adhesive ligands allows QCM-based detection of early integrin binding

Jagoba Iturri<sup>(1)</sup>, Luis García-Fernández<sup>(1)</sup>, Ute Reuning<sup>(3)</sup>, Andrés J. García<sup>(4)</sup>,  
Aránzazu del Campo<sup>(1)\*</sup>, Marcelo J. Salierno<sup>(1,2)\*</sup>

<sup>(1)</sup> Max Planck Institut for Polymer Research, Ackermannweg 10, 55128 Mainz, Germany.

<sup>(2)</sup> National Scientific and Technical Research Council. Av. Rivadavia 1917, C1033AAJ CABA, Argentina.

<sup>(3)</sup> Clinical Research Unit, Dept. for Obstetrics & Gynecology, Technische Universitaet München, Munich, Germany.

<sup>(4)</sup> Woodruff School of Mechanical Engineering and Petit Institute for Bioengineering and Bioscience, Georgia Institute of Technology, Atlanta, GA 30332, USA

## FIGURES

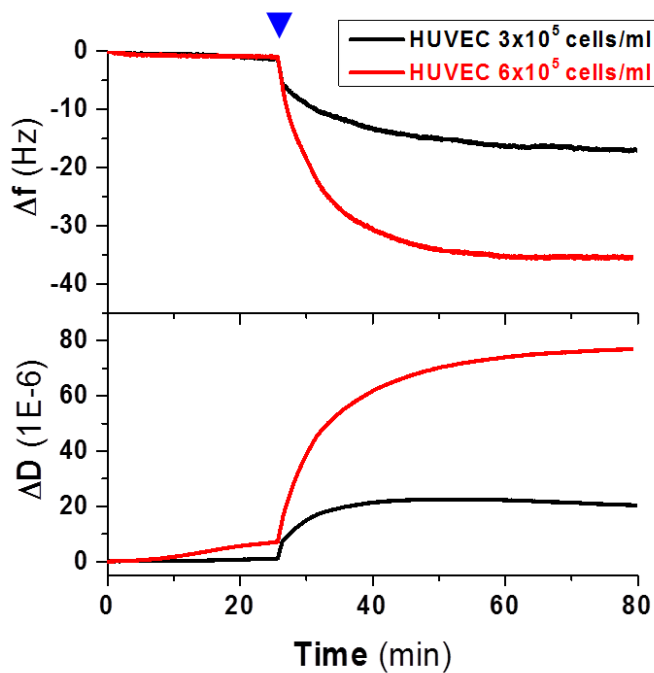

**Figure S11. QCM-D monitoring of HUVEC attachment to RGD(DMNPB)fK crystals using two different cell concentrations.** Arrow head shows the onset of UV-LED exposure (i.e. RGD activation). The frequency and dissipation changes associated with cell attachment increase with the density of the injected cell suspensions.

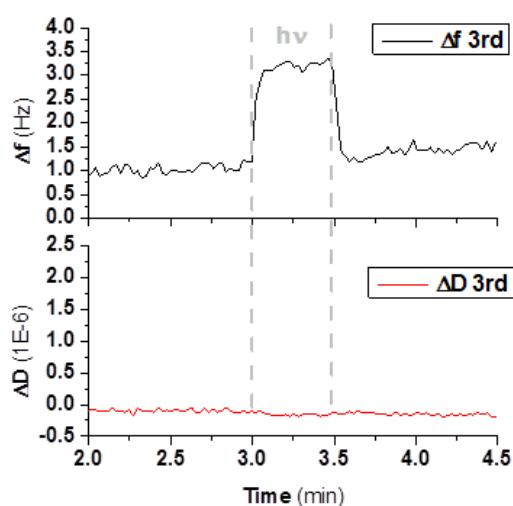

**Figure S12. Photoinduced noise in the QCM curves as consequence of the irradiation of the crystal.** A RGD(DMNPB)fK modified crystal was irradiated for 30 s with LED ( $\lambda = 405$  nm) lamp. The experiment was performed in PBS. When the lamp was turned on ( $t = 0$  s), an immediate jump in the frequency signal was detected. The jump turned back when the LED light was turned off ( $t = 30$  s). The dissipation signal did not show any changes.

## TABLES

|                            | Control                    | Anti $\alpha_v\beta_3$      |
|----------------------------|----------------------------|-----------------------------|
| HUVEC                      | $0.97 \pm 0.12 \text{ Hz}$ | $0.40 \pm 0.15 \text{ Hz}$  |
| OV-MZ-6-wt                 | $0.45 \pm 0.18 \text{ Hz}$ | --                          |
| OV-MZ-6- $\alpha_v\beta_3$ | $0.91 \pm 0.24 \text{ Hz}$ | $0.020 \pm 0.11 \text{ Hz}$ |

**Table SI1. Average value of  $\Delta f_1$  corresponding to the attachment of HUVEC and OV-MZ-6 cells to RGD(DMNPB)fK functionalized crystals after light exposure in the presence and absence of *anti- $\alpha_v\beta_3$*  antibody.** The addition of the antibody significantly reduces integrin binding response. Cell concentration used in all experiments was  $3 \times 10^5$  cells/ml. Data are given as mean  $\pm$  s.d.

## **MOVIES**

**Movie1. Cell adhesion after RGD(DMNPB)fK photoactivation.** Cells seeded on Crystals functionalized with RGD(DMNPB)fK were followed by time-lapse microscopy. LED 360 nm irradiation was performed during 30 s in the time interval covered by 0,5 - 1,5 seconds in the movie. Objective used was 40 X magnification. Pictures were taken every 2 seconds and movie frame rate was set at 15 pictures per second.
